# Supplementary material for: A CT-Based Radiomic Signature Can Be Prognostic for 10-Months Overall Survival in Metastatic Tumors Treated with Nivolumab: An Exploratory Study
Source: MDPI journal article supplement (doi:10.3390/diagnostics11060979), 2021-05-28
Supplement: s1 [file s1]

# Supplementary material: A CT-based radiomic signature can be prognostic for 10-months overall survival in metastatic tumors treated with nivolumab

Valentina D.A. Corino <sup>1,\*</sup>, Marco Bologna <sup>1</sup>, Giuseppina Calareso <sup>2</sup>, Lisa Licitra <sup>3,4</sup>, Mariagrazia Ghi <sup>5</sup>, Gaetana Rinaldi <sup>6</sup>, Francesco Caponigro <sup>7</sup>, Franco Morelli <sup>8</sup>, Mario Airolidi <sup>9</sup>, Giacomo Allegrini <sup>10</sup>, Alessandra Cassano <sup>11</sup>, Daris Ferrari <sup>12</sup>, Aurora Mirabile <sup>13</sup>, Alice Tosoni <sup>14</sup>, Danilo Galizia <sup>15</sup>, Marco Merlano <sup>15,16</sup>, Andrea Sponghini <sup>17</sup>, Gabriella Moretti <sup>18</sup>, Luca Mainardi <sup>1</sup> and Paolo Bossi <sup>19</sup>

Table S1. Distribution of the different scanners used in the study.

| Scanner_Model ▾          | Scanner_Vend ▾↑ | Acquired_Patients_Numb ▾ |
|--------------------------|-----------------|--------------------------|
| BrightSpeed              | GE              | 2                        |
| Discovery CT 750 HD      | GE              | 1                        |
| LightSpeed Pro 32        | GE              | 1                        |
| LightSpeed RT 16         | GE              | 1                        |
| LightSpeed VCT           | GE              | 6                        |
| Optima CT 540            | GE              | 3                        |
| Optima CT 660            | GE              | 7                        |
| Revolution Evo           | GE              | 4                        |
| Eclos                    | Hitachi         | 3                        |
| Scenaria                 | Hitachi         | 1                        |
| Brilliance 16            | Philips         | 8                        |
| Brilliance 40            | Philips         | 1                        |
| Brilliance 64            | Philips         | 7                        |
| iCT 128                  | Philips         | 3                        |
| iCT 256                  | Philips         | 3                        |
| Ingenuity                | Philips         | 2                        |
| Biograph 16              | Siemens         | 1                        |
| Biograph 6               | Siemens         | 1                        |
| Sensation 64             | Siemens         | 6                        |
| Somatom Definition AS    | Siemens         | 2                        |
| Somatom Definition AS+   | Siemens         | 2                        |
| Somatom Definition Flash | Siemens         | 8                        |
| Somatom Force            | Siemens         | 1                        |
| Somatom Perspective      | Siemens         | 3                        |
| Aquilion                 | Toshiba         | 8                        |

**Table S2.** Image acquisition parameters for the computed tomography (CT) images used in the studies. Numeric values are expressed as median and inter-quartile ranges.

| CT IMAGE ACQUISITION PARAMETERS |                  |
|---------------------------------|------------------|
| Tube Voltage (kVP)              | 120 [120-120]    |
| Tube current (mA)               | 197 [121-297]    |
| Slice thickness (mm)            | 2.5 [1.5-3]      |
| Pixel spacing (mm)              | 0.51 [0.50-0.82] |

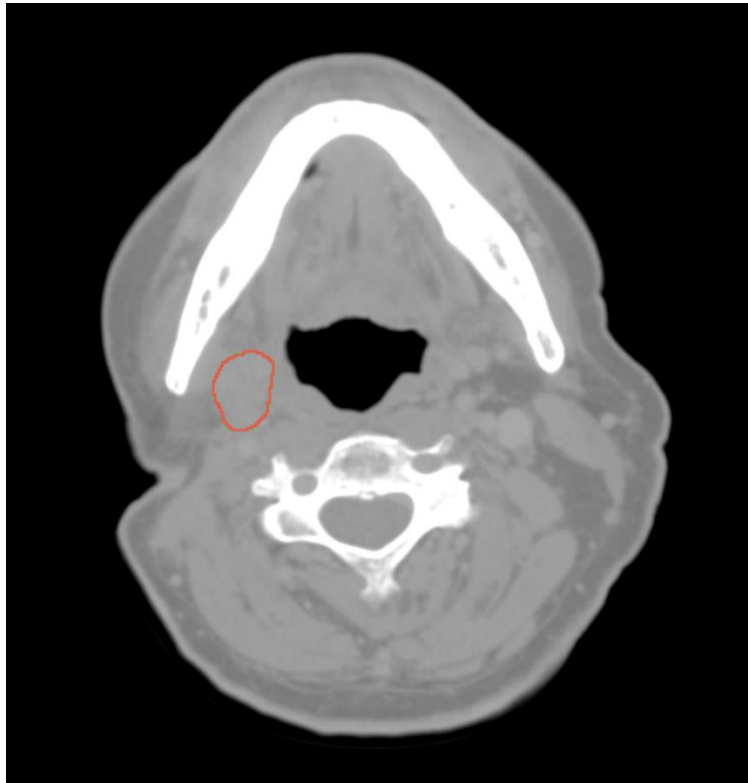

**Figure S1.** Example of computed tomography image with the segmented tumor.
